# Supplementary material for: Physiological increase of yolk testosterone level does not affect oxidative status and telomere length in gull hatchlings
Source: PLoS One. 2018 Oct 26;13(10):e0206503. doi: 10.1371/journal.pone.0206503 (PMC6203383; doi:10.1371/journal.pone.0206503)
Supplement: S1 Data — (XLSX) [file pone.0206503.s001.xlsx]

## Sheet: Foglio1
progr	idnest	layingorder	sex	egg weight	treatment	incubation	TOS	TAC	RTL
1	2	1	1	87	0	30	51.6667	3606.92	0.969093
3	2	2	2	82.2	1	27	87.2222	4611.92	1.00177
5	2	3	2	81.6	1	26	58.8889	3179.42	0.94895
7	3	1	2	77.5	1	28	1109.93	5302.44	0.978972
13	5	1	1	96.1	1	29	778.133	5885.11	0.991424
15	5	2	1	93.6	0	27	621.333	6733.78	0.989708
17	5	3	1	89.9	0	27			0.969858
23	6	3	1	89	1	27	1214.93	9621.78	0.970872
27	7	2	2	88.4	0	28	297.222	5427.42	0.975444
29	7	3	2	81.5	0	27	355.333	5314.44	0.940094
33	8	2	1	81.8	1	26	16.6666	4181.42	0.982483
35	8	3	2	77.5	1	25	405.556	6336.42	0.943857
37	11	1	2	84.9	1	27	623.333	6392.78	0.941424
41	11	3	2	74.6	1	26	1053.33	4758.67
45	12	2	2	91.2	1	26	890.333	5535.11	0.96033
53	13	3	2	77.2	0	27	630.333	6228.78	0.92446
59	15	3	2	71.2	1	28	684.333	7001.78	0.936649
61	18	1	2	89.6	1	30	847.333	5472.44	0.976414
65	18	3	2	83.3	1	26	222.222	4165.42	0.93511
69	19	2	2	99.6	0	28	112.222	3874.17	0.945633
71	19	3	2	95.5	1	25	177.067	3958.17	0.950507
75	23	2	1	93.5	0	30	70.5555	4335.67	0.986143
77	23	3	1	99.7	1	28	70.5555	4479.67	0.983443
81	27	2	2	88.9	1	29	278.889	4335.67	0.994511
83	27	3	2	72.4	1	28	756.333	5958.11	1.02288
87	28	2	1	86.2	0	26	31.1111	3661.17	0.942902
89	28	3	2	82.8	1	26	88.8889	3755.92	0.906473
91	31	1	1	84.4	0	29	46.1111	4400.67	0.968331
93	31	2	2	77.3	1	26	252.778	3370.92	0.943293
99	33	2	1	94.6	0	26	326.7	6103.11	1.01983
103	101	1	1	94	1	29	592.222	6127.67	0.985381
111	102	2	1	85.5	0	27	233.067	3997.92	0.927632
113	102	3	1	84.1	1	25	1775.33
115	103	1	1	85.9	0	29	309.444	4383.17	1.13443
121	105	1	1	99.3	1	28	63.3333	3474.92	0.988419
123	105	2	1	105	0	26	247.083	4460.25	1.02881
127	107	1	2	84.5	1	29	841.458	4647.25	0.978176
133	109	1	2	85	1	29	350.208	4238.75	0.977025
143	111	3	2	92.3	1	27		5519	0.951812
145	113	1	1	86.4	1	28	17.0834	4058.5	1.00415
149	113	3	1	82.8	0	25	336.458	6047	0.984225
153	114	2	1	90.7	1	27	62.7083	2527.5	1.02297
155	114	3	1	83.7	1	27	485.067	3934.75	0.906142
159	115	2	2	76.2	1	28	811.458	7481.75	1.00475
163	118	1	2	73.7	1	27	1608.33	8902.44	0.929815
169	119	1	1	90.5	0	28	242.708	4986.25	0.960907
173	119	3	2	81.6	1	25	364.583	4621.5	0.977241
177	120	2	1	96.9	0	29	293.958	4284.75	0.988785
179	120	3	2	83.3	1	26	298.333	3902.75	0.969889
183	121	2	2	81.2	1	26	301.458	4477.5	0.974235
187	127	1	1	98.5	0	30	1173.96	4512.25	0.995822
191	127	3	2	87.7	1	25	49.8667	4019.5	0.952446
195	128	2	2	79.2	1	28	358.958	5018.75	1.04207
197	128	3	1	81.6	0	27	393.333	4960.25	0.966758
199	129	1	2	86.6	1	31	169.583	3947.75	0.99582
207	130	2	2	86.3	1	28	140.208	4348.25	1.03304
209	130	3	2	79.7	1	27	932.708	4454.25	0.848408
213	131	2	1	101.6	1	27	906.133	6424.89	1.0209
217	133	1	1	81.5	1	25	873.889	6152.89	0.936303
225	134	2	1	80.7	1	27	2642.22	6410.89	0.985224
227	134	3	2	73.2	1	25	1423.89	7192.56	0.950724
229	135	1	1	93.3	1	30		6387.22	0.931831
237	136	2	2	96	1	27	1477.22	6132.89	0.914704
241	139	1	2	84.8	1	30	1343.89	5363.22	0.904167
249	302	2	1	87.9	1	28	195.033	5450.11	0.98651
251	302	3	1	77.9	1	25	664.533	6017.44	1.00055
259	309	1	2	87.9	0	29	453.3	5911.44	1.02707
261	309	2	1	87.3	1	27		6524.78	0.947907
267	311	2	1	93.2	0	27	433.717	7140.33	0.98422
269	311	3	2	79.3	0	26	1209.72	6097.67	0.95317
271	201	1	1	82	0	31	1468.89	6316.56	1.02837
273	201	2	1	79.3	1	27	652.222	4741.89	0.975728
277	202	1	1	76.5	0	28		6642.56	1.03248
283	204	1	2	89.4	0	29	1782.22	4538.89	0.9024
285	204	2	2	79	1	27	2093.89	8406.89	0.927162
289	208	1	1	87.8	1	30	815.111	3283.44	0.91624
295	209	1	1	76	0	27	2315.56	4664.56	0.94513
297	209	2	1	70.3	1	26	653.889	5040.56	0.906227
303	211	2	1	98.6	1	28	715.556	4583.22	0.9944
305	211	3	2	94.2	0	25	1447.22	5544.22	0.990399
307	215	1	1	87.7	0	31	678.889	5377.89	0.970739
309	215	2	2	86.3	1	28	402.222	5411.56	0.956168
313	218	1	1	86.3	1	29	2463.89	5664.89	0.967275
317	218	3	1	83.5	0	25	2376.81	4446.22	1.01952
319	501	1	1	75	1	28	377.692	6288.67	1.03969
323	501	3	1	71.2	0	25	562.917	6046.33	1.02671
325	503	1	2	78.7	1	29	562.842	7007.33	1.04793
327	503	2	1	80.6	0	27	380.267	5338.33	0.988664
329	503	3	1	76.9	1	26	569.467	6091.33	0.939236
333	504	2	2	88.3	1	27	448.767	7054.33	0.967111
337	507	1	1	90	1	29	950.417	8897.67	1.03327
345	511	2	1	90.9	0	28	921.667	6289.67	0.932991
347	511	3	2	91.5	0	27	1491.67	5977	0.905594
349	517	1	2	95.8	1	28	624.342	5387	0.946719
359	518	3	1	85	1	25
363	519	2	2	75.6	0	28	677.917	5390.33	0.954849
369	523	2	2	84.3	0	27	268.267	6038	0.936358
377	524	3	1	95.9	0	26	453.192	5228.33	0.971323
379	528	1	1	104.3	0	29	1127.92	5407.33	0.927765
383	528	3	1	89.6	1	24	1042.92	5151.67	0.887404
385	529	1	1	89.2	1	29	596.667	5457	0.977406
387	529	2	1	80.5	0	27	466.042	5468.67	0.972729
395	530	3	2	84.7	0	26	1215.42	5780	0.917099
399	531	2	2	97.9	0	27	1579.17	6163	1.06499
401	531	3	2	88.4	0	25		5708.67	0.969654
